# Supplementary material for: R-Isophthalate (R = –H, –NO2, and –COOH) as modular building blocks for mixed-ligand coordination polymers incorporated with a versatile connector 4-amino-3,5-bis(3-pyridyl)-1,2,4-triazole
Source: Royal Society of Chemistry journal article supplement (doi:10.1039/b711447h), 2008-01-01
Supplement: b711447h.pdf [file b711447h.pdf]

## *Electronic Supplementary Information (ESI) for B711447H*

### **R-Isophthalate (R = -H, -NO<sub>2</sub>, and -COOH) as modular building blocks for mixed-ligand coordination polymers incorporated with a versatile connector 4-amino-3,5-bis(3-pyridyl)-1,2,4-triazole**

Miao Du,\* Zhi-Hui Zhang, Yan-Ping You, and Xiao-Jun Zhao

*College of Chemistry and Life Science, Tianjin Normal University, Tianjin 300387, P. R. China*

#### **Caption to figures**

- Fig. S1** (a) Layered network of **1a** showing hydrogen bonds within and between the 1-D coordination arrays. (b) 3-D hydrogen-bonded structure of **1a**.
- Fig. S2** 3-D hydrogen-bonded network of **1b** viewed along [100], in which the lattice water molecules are omitted for clarity.
- Fig. S3** (a) A packing diagram of **2a** showing the interlayer aromatic stacking interactions, in which the lattice water molecules are omitted for clarity. (b) A view of the water tetramer in **2a**, in which the green dashes indicate the H-bonds. (c) A perspective view of the 3-D packing diagram of **2a** along [010], in which the included water tetramers are indicated in red.
- Fig. S4** 3-D hydrogen-bonded network of **2b** viewed along [001], in which the lattice water molecules are omitted for clarity.

- Fig. S5** (a) A packing diagram of **2c** viewed along [100], showing the antiparallel stacking of the coordination layers, in which the lattice water molecules are omitted for clarity. (b) 2-D Cu–Htma honeycomb layer of **2c** constructed by coordinative and hydrogen bonding. (c) A portion view of **2c** displaying all hydrogen-bonding interactions in this structure.
- Fig. S6** A portion view of **3a** showing hydrogen bonds between the 1-D coordination frameworks.
- Fig. S7** 3-D supramolecular network of **3b** showing interlayer hydrogen bonds, in which the lattice water molecules are omitted for clarity.
- Fig. S8** TGA curves for compounds **1a–1c** (indicated as black, red, and green lines).
- Fig. S9** TGA curves for compounds **2a–2c** (indicated as black, red, and green lines).
- Fig. S10** TGA curves for compounds **3a–3c** (indicated as black, red, and green lines).

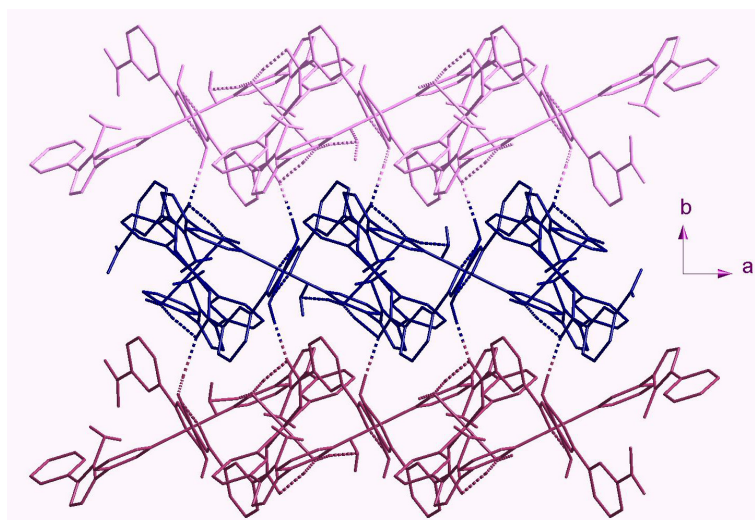

(a)

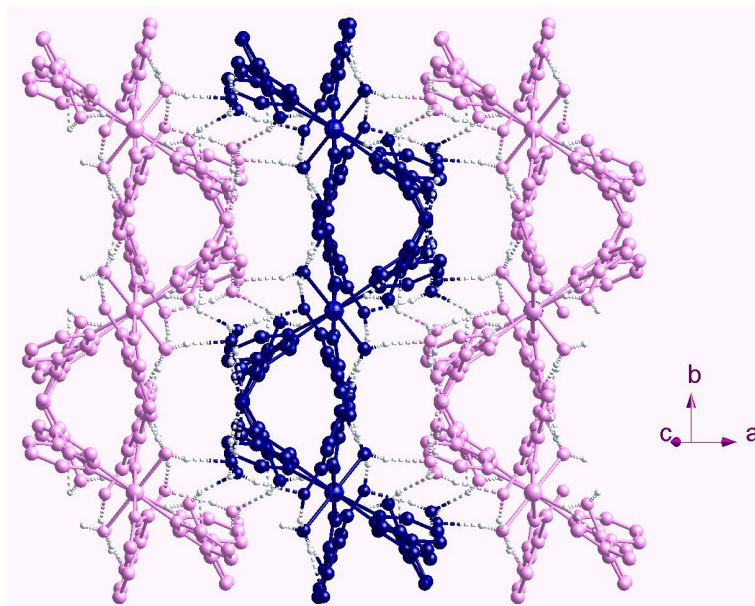

(b)

Fig. S1

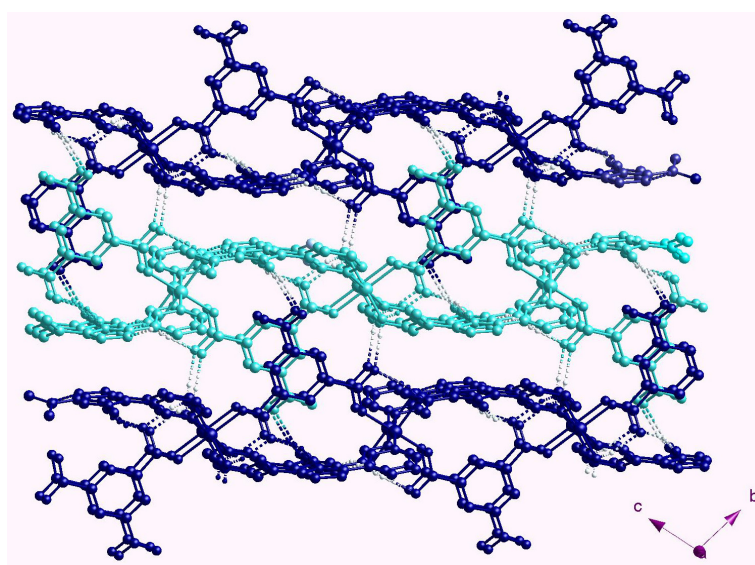

**Fig. S2**

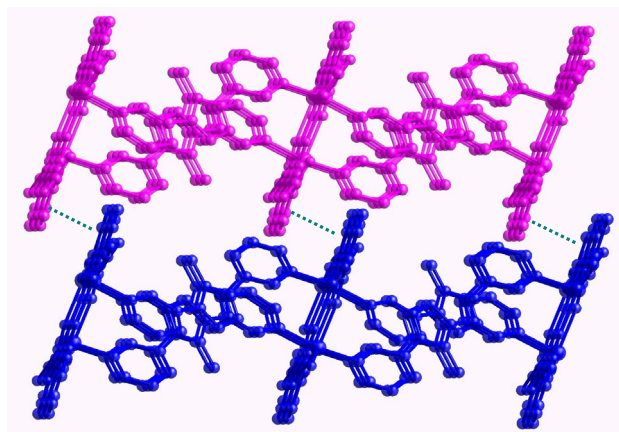

(a)

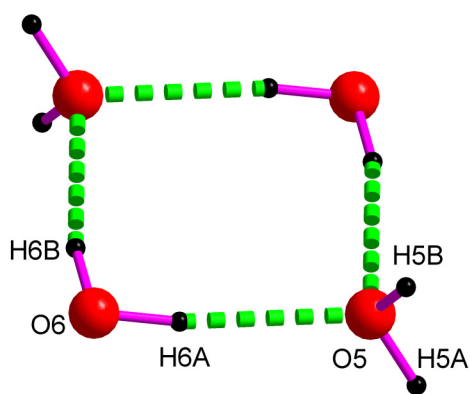

(b)

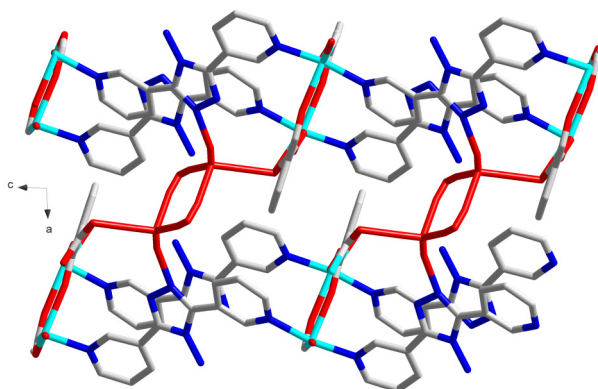

(c)

Fig. S3

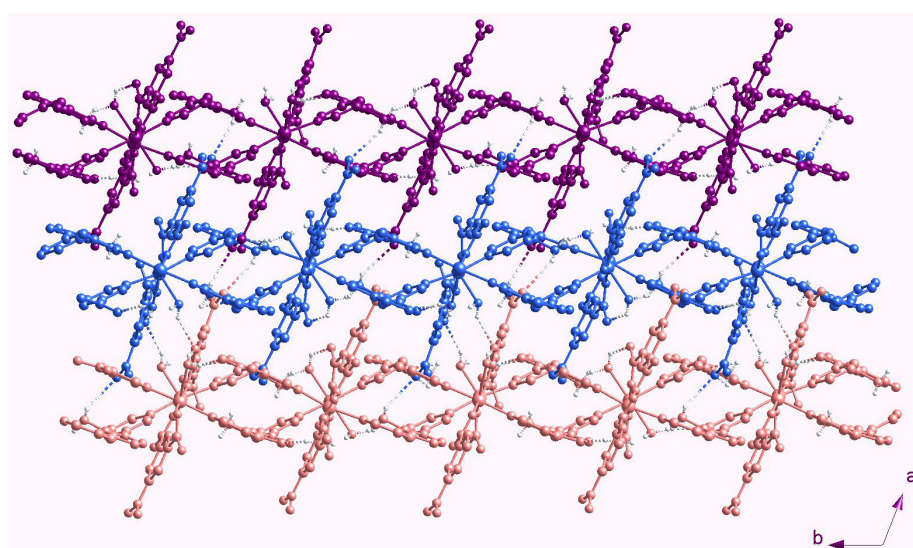

**Fig. S4**

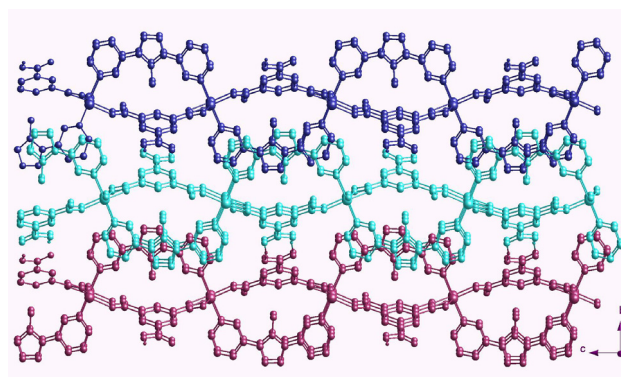

(a)

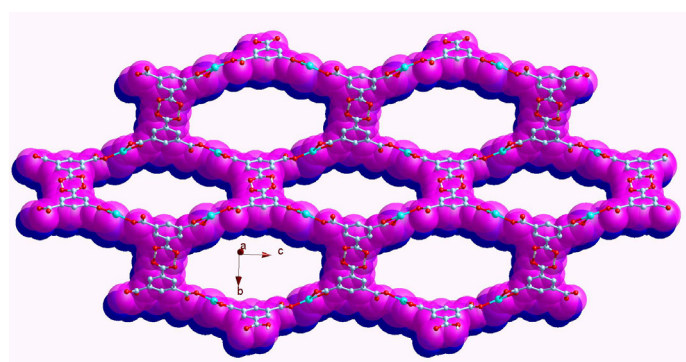

(b)

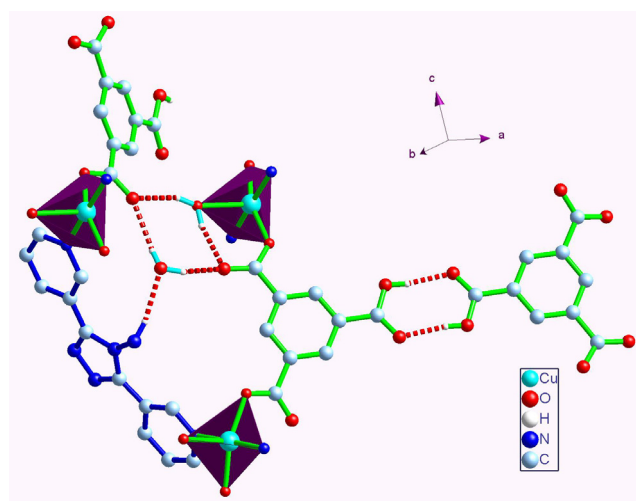

(c)

Fig. S5

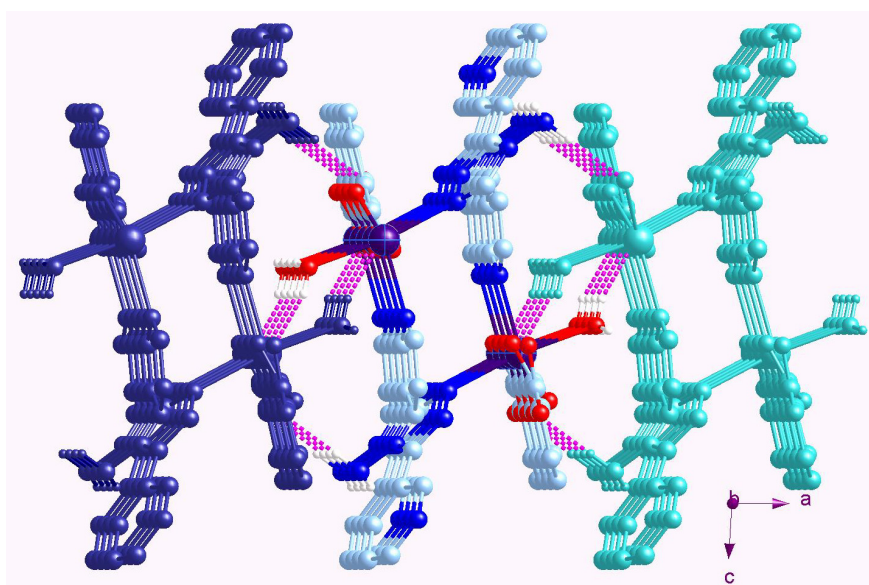

**Fig. S6**



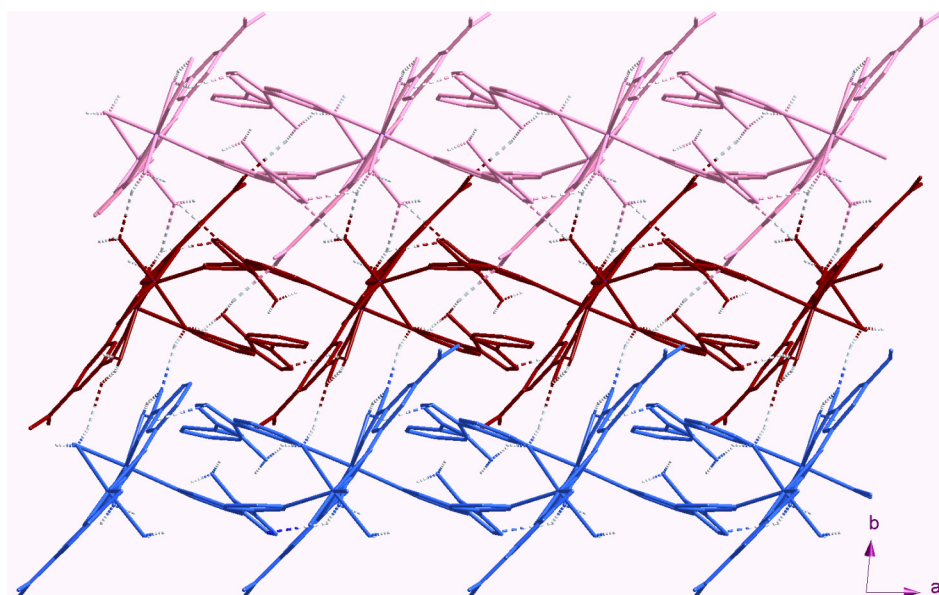

**Fig. S7**

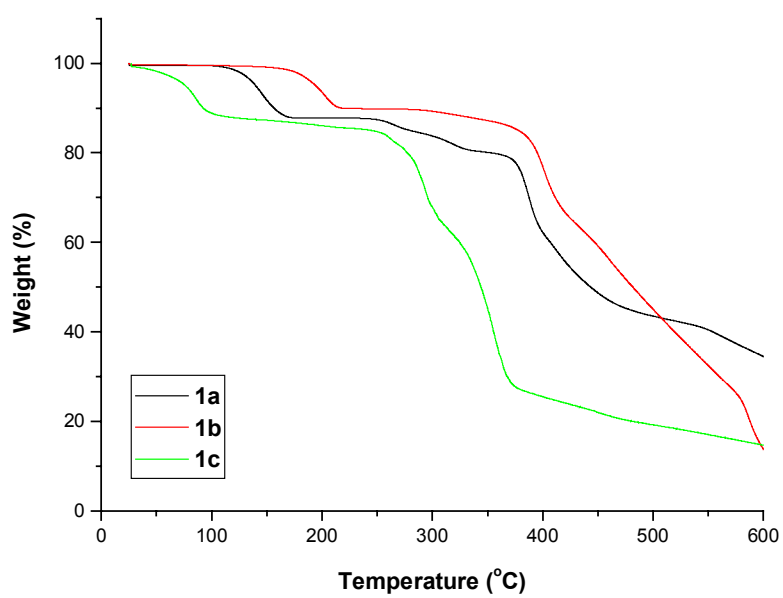

**Fig. S8**

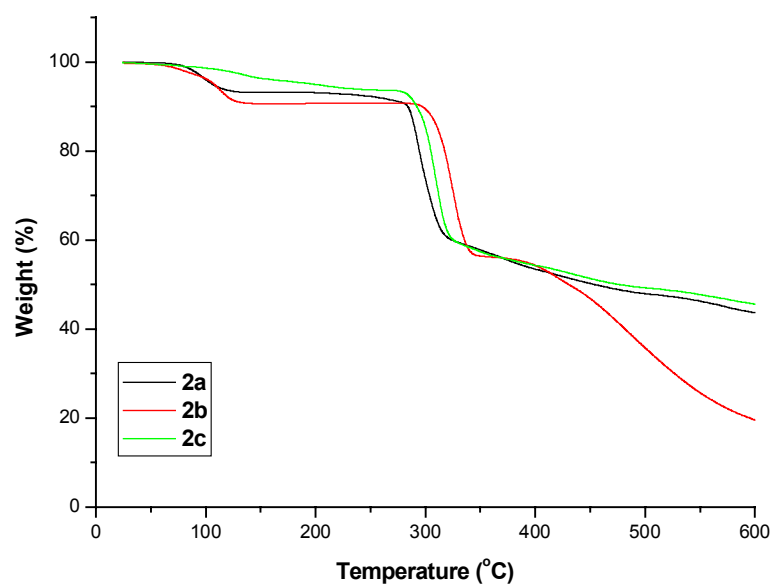

**Fig. S9**

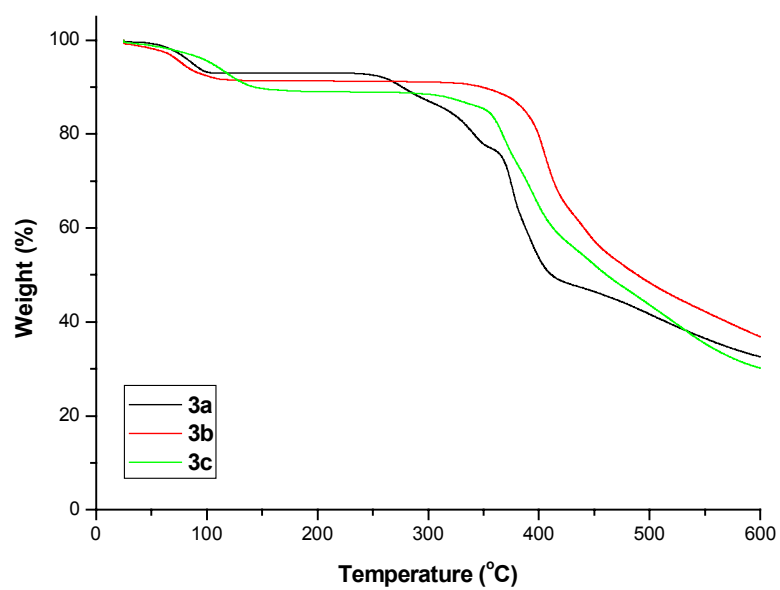

**Fig. S10**

**Table S1** Selective bond lengths (Å) and angles (°) for complexes **1a–1c**

---

| <b>1a</b>  |          |            |          |
|------------|----------|------------|----------|
| Co1–O1     | 2.067(1) | Co1–O6     | 2.130(1) |
| Co1–N1     | 2.163(1) | Co2–O4     | 2.098(1) |
| Co2–N6     | 2.117(1) | Co2–O5     | 2.144(1) |
| O1–Co1–O6  | 90.34(5) | O1–Co1–N1  | 90.29(5) |
| O6–Co1–N1  | 91.21(5) | O4–Co2–N6  | 89.87(5) |
| O4–Co2–O5  | 90.06(5) | N6–Co2–O5  | 86.37(5) |
| <b>1b</b>  |          |            |          |
| Co1–O8     | 2.070(1) | Co1–O4     | 2.105(2) |
| Co1–N6A    | 2.186(2) | Co2–O1     | 2.034(2) |
| Co2–O7     | 2.140(2) | Co2–N1     | 2.143(2) |
| O8–Co1–O4  | 91.28(6) | O8–Co1–N6A | 89.19(6) |
| O4–Co1–N6A | 92.59(6) | O1–Co2–O7  | 91.07(5) |
| O1–Co2–N1  | 90.26(6) | O7–Co2–N1  | 96.54(6) |
| <b>1c</b>  |          |            |          |
| Co1–O8     | 2.090(1) | Co1–O7     | 2.091(1) |
| Co1–N1     | 2.168(2) |            |          |
| O8–Co1–O7  | 89.33(5) | O8–Co1–N1  | 87.51(6) |
| O7–Co1–N1  | 90.89(6) |            |          |

---

Symmetry code for **1b**: A  $x + 1, y, z$ .

**Table S2** Selective bond lengths (Å) and angles (°) for complexes **2a–2c**

---

| <b>2a</b>   |           |             |           |
|-------------|-----------|-------------|-----------|
| Cu1–O4A     | 1.934(1)  | Cu1–N6B     | 2.026(2)  |
| Cu1–O1      | 2.027(1)  | Cu1–N1      | 2.038(2)  |
| Cu1–O3C     | 2.279(2)  | Cu1–O2      | 2.545(2)  |
| O4A–Cu1–N6B | 92.05(7)  | O4A–Cu1–O1  | 150.27(7) |
| N6B–Cu1–O1  | 87.87(7)  | O4A–Cu1–N1  | 93.30(7)  |
| N6B–Cu1–N1  | 170.72(7) | O1–Cu1–N1   | 91.23(7)  |
| O4A–Cu1–O3C | 120.49(6) | N6B–Cu1–O3C | 86.13(7)  |
| O1–Cu1–O3C  | 89.18(6)  | N1–Cu1–O3C  | 84.63(7)  |
| O4A–Cu1–O2  | 95.01(7)  | N6B–Cu1–O2  | 102.93(7) |
| O1–Cu1–O2   | 56.24(7)  | N1–Cu1–O2   | 84.18(7)  |
| O2–Cu1–O3C  | 143.25(6) |             |           |
| <b>2b</b>   |           |             |           |
| Cu1–O1      | 1.959(3)  | Cu1–O7      | 1.961(4)  |
| Cu1–N1      | 2.051(4)  | Cu1–N7      | 2.056(4)  |
| Cu1–O25     | 2.254(3)  | Cu2–O22A    | 1.960(3)  |
| Cu2–O13     | 1.965(3)  | Cu2–N12     | 2.034(4)  |
| Cu2–N6B     | 2.038(4)  | Cu2–O28     | 2.284(4)  |
| Cu3–O19     | 1.957(4)  | Cu3–O18C    | 1.978(4)  |
| Cu3–N19     | 2.048(4)  | Cu3–N18     | 2.066(4)  |
| Cu3–O26     | 2.361(4)  | Cu3–O27     | 2.415(4)  |
| Cu4–O9      | 1.953(3)  | Cu4–O6D     | 1.971(3)  |
| Cu4–N13     | 2.013(4)  | Cu4–N24B    | 2.020(4)  |
| Cu4–O29     | 2.492(3)  |             |           |

|              |            |              |            |
|--------------|------------|--------------|------------|
| O1–Cu1–O7    | 174.58(16) | O1–Cu1–N1    | 92.01(15)  |
| O7–Cu1–N1    | 89.97(15)  | O1–Cu1–N7    | 89.51(15)  |
| O7–Cu1–N7    | 89.31(15)  | N1–Cu1–N7    | 171.04(17) |
| O1–Cu1–O25   | 88.84(14)  | O7–Cu1–O25   | 85.97(15)  |
| N1–Cu1–O25   | 94.51(15)  | N7–Cu1–O25   | 94.34(15)  |
| O22A–Cu2–O13 | 172.80(16) | O22A–Cu2–N12 | 90.78(16)  |
| O13–Cu2–N12  | 86.74(16)  | O22A–Cu2–N6B | 92.67(16)  |
| O13–Cu2–N6B  | 90.95(16)  | N12–Cu2–N6B  | 169.54(17) |
| O22A–Cu2–O28 | 84.97(15)  | O13–Cu2–O28  | 89.09(15)  |
| N12–Cu2–O28  | 104.32(15) | N6B–Cu2–O28  | 85.82(16)  |
| O19–Cu3–O18C | 179.07(14) | O19–Cu3–N19  | 91.95(15)  |
| O18C–Cu3–N19 | 88.91(15)  | O19–Cu3–N18  | 88.33(16)  |
| O18C–Cu3–N18 | 90.82(16)  | N19–Cu3–N18  | 177.88(17) |
| O19–Cu3–O26  | 90.13(15)  | O18C–Cu3–O26 | 89.51(15)  |
| N19–Cu3–O26  | 90.85(15)  | N18–Cu3–O26  | 91.25(15)  |
| O19–Cu3–O27  | 84.91(15)  | O18C–Cu3–O27 | 95.43(15)  |
| N19–Cu3–O27  | 90.21(14)  | N18–Cu3–O27  | 87.73(15)  |
| O26–Cu3–O27  | 174.96(13) | O9–Cu4–O6D   | 178.30(15) |
| O9–Cu4–N13   | 91.81(16)  | O6D–Cu4–N13  | 89.89(16)  |
| O9–Cu4–N24B  | 88.60(15)  | O6D–Cu4–N24B | 89.69(15)  |
| N13–Cu4–N24B | 176.90(18) | O9–Cu4–O29   | 85.05(15)  |
| N13–Cu4–O29  | 82.06(15)  | O6D–Cu4–O29  | 95.35(13)  |
| N24B–Cu4–O29 | 101.02(15) |              |            |

**2c**

|            |           |           |           |
|------------|-----------|-----------|-----------|
| Cu1–O2     | 1.938(2)  | Cu1–O6A   | 1.950(2)  |
| Cu1–N6     | 2.026(3)  | Cu1–N1B   | 2.035(3)  |
| Cu1–O7     | 2.318(3)  |           |           |
| O2–Cu1–O6A | 159.73(9) | O2–Cu1–N6 | 88.55(10) |

|             |           |            |           |
|-------------|-----------|------------|-----------|
| O6A–Cu1–N6  | 90.07(10) | O2–Cu1–N1B | 89.84(10) |
| O6A–Cu1–N1B | 91.31(10) | N6–Cu1–N1B | 178.34(9) |
| O2–Cu1–O7   | 92.47(9)  | O6A–Cu1–O7 | 107.78(9) |
| N6–Cu1–O7   | 91.06(10) | N1B–Cu1–O7 | 89.39(10) |

---

Symmetry codes for **2a**: A  $x, y - 1, z$ ; B  $x, y + 1, z - 1$ ; C  $-x + 1, -y + 2, -z + 1$ . **2b**: A  $x, y + 1, z$ ; B  $x, y + 1, z + 1$ ; C  $x, y - 1, z - 1$ ; D  $x, y, z - 1$ . **2c**: A  $x - 1/2, -y + 1/2, z - 1/2$ ; B  $x - 1/2, -y + 1/2, z + 1/2$ .



**Table S3** Selective bond lengths (Å) and angles (°) for complexes **3a–3c**

---

| <b>3a</b>   |            |             |           |
|-------------|------------|-------------|-----------|
| Cd1–O4A     | 2.258(2)   | Cd1–O5      | 2.305(2)  |
| Cd1–N1B     | 2.331(2)   | Cd1–O1      | 2.363(2)  |
| Cd1–N2      | 2.376(2)   | Cd1–O2      | 2.540(2)  |
| O4A–Cd1–O5  | 81.55(6)   | O4A–Cd1–N1B | 136.04(6) |
| O5–Cd1–N1B  | 85.70(7)   | O4A–Cd1–O1  | 88.38(6)  |
| O5–Cd1–O1   | 96.31(6)   | N1B–Cd1–O1  | 134.94(6) |
| O4A–Cd1–N2  | 87.47(6)   | O5–Cd1–N2   | 169.02(6) |
| N1B–Cd1–N2  | 102.42(7)  | O1–Cd1–N2   | 83.26(6)  |
| O4A–Cd1–O2  | 138.88(6)  | O5–Cd1–O2   | 88.85(6)  |
| N1B–Cd1–O2  | 82.24(6)   | O1–Cd1–O2   | 52.90(5)  |
| N2–Cd1–O2   | 99.48(6)   |             |           |
| <b>3b</b>   |            |             |           |
| Cd1–N1      | 2.298(4)   | Cd1–N7      | 2.316(4)  |
| Cd1–O2      | 2.334(3)   | Cd1–O13     | 2.346(3)  |
| Cd1–O12A    | 2.440(3)   | Cd1–O14     | 2.453(4)  |
| Cd1–O11A    | 2.507(3)   | Cd2–O16     | 2.294(3)  |
| Cd2–O7      | 2.306(3)   | Cd2–O15     | 2.325(4)  |
| Cd2–O6      | 2.344(3)   | Cd2–N12B    | 2.383(4)  |
| Cd2–O8      | 2.500(3)   | Cd2–O5      | 2.526(3)  |
| N1–Cd1–N7   | 177.87(13) | N1–Cd1–O2   | 91.24(12) |
| N7–Cd1–O2   | 90.59(12)  | N1–Cd1–O13  | 85.67(13) |
| N7–Cd1–O13  | 95.67(13)  | O2–Cd1–O13  | 81.53(11) |
| N1–Cd1–O12A | 92.74(12)  | N7–Cd1–O12A | 85.86(12) |

|              |            |               |            |
|--------------|------------|---------------|------------|
| O2–Cd1–O12A  | 161.18(11) | O13–Cd1–O12A  | 80.44(12)  |
| N1–Cd1–O14   | 93.48(13)  | N7–Cd1–O14    | 86.03(13)  |
| O2–Cd1–O14   | 72.64(12)  | O13–Cd1–O14   | 154.14(13) |
| O12A–Cd1–O14 | 125.38(12) | N1–Cd1–O11A   | 82.13(12)  |
| N7–Cd1–O11A  | 95.74(12)  | O2–Cd1–O11A   | 145.85(10) |
| O13–Cd1–O11A | 130.80(11) | O12A–Cd1–O11A | 52.97(10)  |
| O14–Cd1–O11A | 74.37(11)  | O16–Cd2–O7    | 94.34(13)  |
| O16–Cd2–O15  | 174.54(14) | O7–Cd2–O15    | 85.92(13)  |
| O16–Cd2–O6   | 81.04(12)  | O7–Cd2–O6     | 152.53(12) |
| O15–Cd2–O6   | 96.21(13)  | O16–Cd2–N12B  | 82.72(13)  |
| O7–Cd2–N12B  | 81.30(13)  | O15–Cd2–N12B  | 102.70(15) |
| O6–Cd2–N12B  | 124.40(13) | O16–Cd2–O8    | 83.15(13)  |
| O7–Cd2–O8    | 54.08(12)  | O15–Cd2–O8    | 92.63(14)  |
| O6–Cd2–O8    | 98.45(12)  | N12B–Cd2–O8   | 131.65(12) |
| O16–Cd2–O5   | 101.67(13) | O7–Cd2–O5     | 152.98(12) |
| O15–Cd2–O5   | 80.18(13)  | O6–Cd2–O5     | 53.04(11)  |
| N12B–Cd2–O5  | 79.34(12)  | O8–Cd2–O5     | 148.92(12) |

**3c**

|             |            |            |            |
|-------------|------------|------------|------------|
| Cd1–N6A     | 2.295(3)   | Cd1–N1     | 2.297(3)   |
| Cd1–O8      | 2.329(3)   | Cd1–O7     | 2.421(3)   |
| Cd1–O1      | 2.468(3)   | Cd1–O3A    | 2.492(2)   |
| Cd1–O2      | 2.498(3)   |            |            |
| N6A–Cd1–N1  | 170.95(11) | N6A–Cd1–O8 | 94.39(12)  |
| N1–Cd1–O8   | 89.25(12)  | N6A–Cd1–O7 | 83.59(10)  |
| N1–Cd1–O7   | 89.67(10)  | O8–Cd1–O7  | 155.58(10) |
| N6A–Cd1–O1  | 92.37(12)  | N1–Cd1–O1  | 96.46(11)  |
| O8–Cd1–O1   | 79.17(11)  | O7–Cd1–O1  | 125.17(9)  |
| N6A–Cd1–O3A | 86.17(10)  | N1–Cd1–O3A | 86.66(10)  |

|            |            |            |            |
|------------|------------|------------|------------|
| O8–Cd1–O3A | 76.30(10)  | O7–Cd1–O3A | 79.29(8)   |
| O1–Cd1–O3A | 155.23(10) | N6A–Cd1–O2 | 91.67(10)  |
| N1–Cd1–O2  | 92.18(10)  | O8–Cd1–O2  | 131.01(11) |
| O7–Cd1–O2  | 73.41(9)   | O1–Cd1–O2  | 52.00(10)  |
| O3A–Cd1–O2 | 152.68(9)  |            |            |

---

Symmetry codes for **3a**: A  $x, y - 1, z$ ; B  $-x + 1, -y + 2, -z + 2$ . **3b**: A  $x, y, z + 1$ ; B  $x + 1, y, z$ . **3c**:  
A  $-x + 1/2, y + 1/2, -z + 1/2$ .

**Table S4** Possible hydrogen-bonding metrics in the structures of **1a–1c**

| Compound                 | D–H...A                  | D...A (Å) | H...A (Å) | D–H...A (°) |
|--------------------------|--------------------------|-----------|-----------|-------------|
| <b>1a</b>                | O5–H5B...O3              | 2.709(2)  | 1.89      | 163         |
|                          | O6–H6B...O2              | 2.697(2)  | 1.87      | 163         |
|                          | O6–H6A...O3 <sup>a</sup> | 2.782(2)  | 1.94      | 173         |
|                          | N5–H5'...O8 <sup>b</sup> | 2.919(2)  | 2.05      | 161         |
|                          | O5–H5A...O7 <sup>c</sup> | 2.746(2)  | 1.93      | 162         |
|                          | O7–H7A...N2 <sup>d</sup> | 2.755(2)  | 1.93      | 162         |
|                          | O7–H7B...O8 <sup>e</sup> | 3.041(2)  | 2.40      | 132         |
|                          | O8–H8A...N3 <sup>f</sup> | 2.874(2)  | 2.08      | 156         |
|                          | O8–H8B...O2              | 2.849(2)  | 2.02      | 166         |
| <b>1b</b>                | N5–H5A...O3              | 3.005(3)  | 2.44      | 121         |
|                          | N5–H5A...O5 <sup>g</sup> | 3.348(3)  | 2.55      | 148         |
|                          | N5–H5B...O9 <sup>h</sup> | 3.037(3)  | 2.21      | 152         |
|                          | O7–H7A...N2 <sup>i</sup> | 2.834(3)  | 2.00      | 166         |
|                          | O7–H7B...O2              | 2.742(2)  | 1.93      | 158         |
|                          | O8–H8A...O2 <sup>h</sup> | 2.776(2)  | 1.96      | 159         |
|                          | O8–H8B...O3              | 2.637(2)  | 1.80      | 166         |
|                          | O9–H9A...O7              | 2.986(3)  | 2.33      | 134         |
|                          | O9–H9B...N3 <sup>j</sup> | 3.093(3)  | 2.31      | 153         |
| <b>1c</b>                | O3–H3...O1 <sup>k</sup>  | 2.731(2)  | 1.97      | 154         |
|                          | N5–H5A...O9              | 3.071(3)  | 2.31      | 141         |
|                          | N5–H5B...O1 <sup>k</sup> | 3.040(3)  | 2.20      | 153         |
|                          | O6–H6...N6 <sup>l</sup>  | 2.578(3)  | 1.80      | 158         |
|                          | O7–H7A...N3 <sup>m</sup> | 2.804(2)  | 1.96      | 176         |
|                          | O7–H7B...O1 <sup>k</sup> | 2.764(2)  | 1.92      | 174         |
|                          | O8–H8A...N2 <sup>n</sup> | 2.805(2)  | 1.98      | 164         |
|                          | O8–H8B...O2 <sup>k</sup> | 2.641(2)  | 1.80      | 169         |
|                          | O9–H9A...O5 <sup>l</sup> | 2.922(3)  | 2.56      | 107         |
| O9–H9B...O1 <sup>o</sup> | 3.136(3)                 | 2.51      | 131       |             |

<sup>a</sup>  $-x + 3/2, y - 1/2, -z + 1/2$ . <sup>b</sup>  $x + 1, y, z$ . <sup>c</sup>  $x + 1/2, -y + 1/2, z + 1/2$ . <sup>d</sup>  $x - 1, y, z$ . <sup>e</sup>  $-x + 1/2, y - 1/2, -z + 1/2$ . <sup>f</sup>  $-x + 3/2, y + 1/2, -z + 1/2$ . <sup>g</sup>  $-x, -y + 1, -z$ . <sup>h</sup>  $x, y + 1, z$ . <sup>i</sup>  $-x, -y + 1, -z + 1$ . <sup>j</sup>  $x + 1, y - 1, z$ . <sup>k</sup>  $x, y - 1, z$ . <sup>l</sup>  $-x + 1, -y + 1, -z$ . <sup>m</sup>  $x + 1, y + 1, z$ . <sup>n</sup>  $-x + 2, -y, -z + 1$ . <sup>o</sup>  $x - 1, y - 1, z$ .

**Table S5** Possible hydrogen-bonding metrics in the structures of **2a–2c**

| Compound      | D–H...A                     | D...A (Å) | H...A (Å) | D–H...A (°) |
|---------------|-----------------------------|-----------|-----------|-------------|
| <b>2a</b>     | O5–H5A...N2 <sup>a</sup>    | 2.907(3)  | 2.04      | 164         |
|               | O5–H5B...O2                 | 2.872(3)  | 2.00      | 176         |
|               | O6–H6A...O5 <sup>b</sup>    | 2.843(3)  | 1.97      | 172         |
|               | O6–H6B...O5 <sup>c</sup>    | 2.893(3)  | 1.99      | 167         |
| <b>2b</b>     | O25–H25A...O5 <sup>d</sup>  | 2.827(6)  | 2.02      | 140         |
|               | N5–H5B...O4 <sup>d</sup>    | 3.162(8)  | 2.46      | 136         |
|               | N11–H11B...O24 <sup>e</sup> | 3.036(8)  | 2.42      | 126         |
|               | N17–H17B...O11 <sup>e</sup> | 3.135(7)  | 2.43      | 137         |
|               | N5–H5A...O32                | 3.047(8)  | 2.19      | 162         |
|               | N11–H11A...O36 <sup>f</sup> | 2.983(7)  | 2.13      | 159         |
|               | N17–H17A...O31              | 3.116(7)  | 2.32      | 149         |
|               | N23–H23B...O33 <sup>g</sup> | 2.977(7)  | 2.11      | 163         |
|               | O25–H25B...O31              | 2.795(5)  | 1.87      | 160         |
|               | O26–H26...O32               | 2.784(7)  | 1.84      | 168         |
|               | O28–H28B...O33 <sup>h</sup> | 2.908(6)  | 2.22      | 127         |
|               | O30–H30B...O8               | 2.699(6)  | 1.97      | 144         |
|               | O34–H34B...N12 <sup>i</sup> | 3.359(7)  | 2.61      | 147         |
|               | O35–H35A...O10              | 2.756(7)  | 1.92      | 168         |
|               | O35–H35B...N3 <sup>i</sup>  | 2.947(7)  | 2.12      | 163         |
|               | O36–H36A...O34 <sup>k</sup> | 2.706(7)  | 1.85      | 179         |
|               | O36–H36B...N11 <sup>f</sup> | 2.983(7)  | 2.20      | 153         |
|               | O27–H27B...O17 <sup>l</sup> | 2.726(6)  | 2.00      | 131         |
|               | O28–H28A...N21 <sup>m</sup> | 2.789(6)  | 1.86      | 161         |
|               | O29–H29A...O5 <sup>i</sup>  | 2.661(5)  | 1.86      | 155         |
| O29–H29B...N9 | 2.798(6)                    | 1.97      | 165       |             |
| <b>2c</b>     | O3–H3...O4 <sup>n</sup>     | 2.634(4)  | 1.82      | 169         |
|               | O7–H7A...O1                 | 2.775(4)  | 1.94      | 166         |
|               | O7–H7B...O5 <sup>o</sup>    | 2.766(4)  | 1.98      | 154         |
|               | O8–H8A...O1 <sup>p</sup>    | 2.689(4)  | 1.95      | 145         |
|               | O8–H8B...O5 <sup>q</sup>    | 3.015(5)  | 2.20      | 161         |
|               | N5–H5A...O8 <sup>o</sup>    | 2.973(5)  | 2.16      | 152         |

$a$   $-x + 1, -y + 1, -z + 2$ .  $b$   $x, y, z - 1$ .  $c$   $-x + 2, -y + 1, -z + 1$ .  $d$   $-x, -y + 1, -z$ .  $e$   $-x + 1, -y + 1, -z + 1$ .  $f$   $-x + 1, -y + 2, -z + 1$ .  $g$   $-x + 1, -y, -z + 1$ .  $h$   $x, y + 1, z$ .  $i$   $x, y - 1, z$ .  $j$   $x, y, z + 1$ .  $k$   $x + 1, y + 1, z$ .  $l$   $x, y - 1, z - 1$ .  $m$   $x, y + 1, z + 1$ .  $n$   $-x, -y + 1, -z + 1$ .  $o$   $x + 1/2, -y + 1/2, z - 1/2$ .  $p$   $x - 1, y, z$ .  $q$   $x - 1/2, -y + 1/2, z - 1/2$ .

**Table S6** Possible hydrogen-bonding metrics in the structures of **3a–3c**

| Compound                   | D–H...A                     | D...A (Å) | H...A (Å) | D–H...A (°) |
|----------------------------|-----------------------------|-----------|-----------|-------------|
| <b>3a</b>                  | O5–H5A'...O2 <sup>a</sup>   | 2.775(2)  | 1.95      | 162         |
|                            | O5–H5B'...O7 <sup>b</sup>   | 2.747(3)  | 1.95      | 155         |
|                            | N5–H5A...O1 <sup>c</sup>    | 2.893(3)  | 2.01      | 172         |
|                            | N5–H5B...O6 <sup>d</sup>    | 3.138(5)  | 2.24      | 174         |
|                            | O7–H7A...O3 <sup>e</sup>    | 3.189(3)  | 2.44      | 147         |
|                            | O7–H7A...N3 <sup>d</sup>    | 3.137(3)  | 2.51      | 132         |
|                            | O7–H7B...O3 <sup>f</sup>    | 2.802(3)  | 1.97      | 167         |
| <b>3b</b>                  | N5–H5A...O18                | 3.044(8)  | 2.17      | 163         |
|                            | N5–H5B...O9 <sup>g</sup>    | 3.110(6)  | 2.32      | 147         |
|                            | N11–H11A...O17 <sup>h</sup> | 3.044(5)  | 2.18      | 164         |
|                            | O14–H14A...O15 <sup>i</sup> | 3.286(6)  | 2.37      | 160         |
|                            | O14–H14B...O17 <sup>h</sup> | 2.887(5)  | 2.20      | 128         |
|                            | O15–H15B...N8 <sup>i</sup>  | 3.219(5)  | 2.53      | 128         |
|                            | O16–H16B...O1 <sup>k</sup>  | 2.738(5)  | 1.91      | 164         |
|                            | O17–H17A...N9 <sup>i</sup>  | 2.863(6)  | 2.07      | 154         |
|                            | O17–H17B...O5 <sup>c</sup>  | 2.826(5)  | 1.98      | 175         |
|                            | O13–H13A...O1               | 2.711(5)  | 1.89      | 162         |
|                            | O13–H13B...N2 <sup>h</sup>  | 3.005(6)  | 2.24      | 149         |
| O16–H16A...N6 <sup>l</sup> | 2.780(6)                    | 1.98      | 157       |             |
| <b>3c</b>                  | O7–H7B...O4 <sup>m</sup>    | 2.572(4)  | 1.74      | 166         |
|                            | O6–H6A...O5 <sup>n</sup>    | 2.649(3)  | 1.69      | 173         |
|                            | N5–H5A...O9 <sup>o</sup>    | 2.886(5)  | 2.05      | 157         |
|                            | N5–H5B...O10 <sup>p</sup>   | 3.04(1)   | 2.14      | 174         |
|                            | N5–H5B...O10' <sup>p</sup>  | 3.06(1)   | 2.21      | 158         |
|                            | O7–H7A...O9 <sup>l</sup>    | 2.731(4)  | 1.89      | 176         |
|                            | O8–H8A...O10                | 2.650(9)  | 2.16      | 117         |
|                            | O8–H8A...O10'               | 3.08(1)   | 2.38      | 140         |

<sup>a</sup>  $-x, -y + 2, -z + 2$ . <sup>b</sup>  $-x, -y + 1, -z + 1$ . <sup>c</sup>  $x + 1, y, z$ . <sup>d</sup>  $-x + 1, -y + 1, -z + 1$ . <sup>e</sup>  $-x + 1, -y + 2, -z + 1$ . <sup>f</sup>  $x, y - 1, z - 1$ . <sup>g</sup>  $-x + 1, -y + 2, -z$ . <sup>h</sup>  $x - 1, y, z$ . <sup>i</sup>  $-x, -y + 2, -z$ . <sup>j</sup>  $-x - 1, -y + 2, -z$ . <sup>k</sup>  $-x, -y + 1, -z$ . <sup>l</sup>  $x, y, z - 1$ . <sup>m</sup>  $-x + 1/2, y + 1/2, -z + 1/2$ . <sup>n</sup>  $-x + 1, -y, -z + 2$ . <sup>o</sup>  $x, -y, z - 1/2$ . <sup>p</sup>  $-x + 1/2, y - 1/2, -z + 1/2$ .
